# Supplementary material for: Inheritance of Mitochondria in <em>Pelargonium</em> Section <em>Ciconium</em> (Sweet) Interspecific Crosses
Source: Preprints.org preprint supplement (doi:10.20944/preprints202404.1610.v1), 2024-04-24
Supplement: Supplementary file 3 [file supplementary]

## Sheet: mitome_fragment_assembly
	*when not assembled per marker the coverage was derived from the overall assembly, this may not be representative for the actual fragment, but sufficient to be reliable (>10 reads/marker) in cases where these were not reliable the fragments were recovered piece by piece
	**high overall coverage shows that the assembly 'crossed' over into the plastome
	high reliability of assembly is green, moderate is yellow, low is red
	ok indicates the sequence was derived from the overall assembly but it had good coverage for that particular fragment.
herbarium/plant number	accession	marker	kmer coverage	base coverage	reliability moderate	reliability moderate	reliability	overall coverage kmer/base
RBGE19990489	insularis	COX1	2278	14757	1	1	2
		COX2*	2439	15.8	1	1	2
		COX3*	2439	ok	1	1	2
		cytb	2169	14051	1	1	2
		atp1	5226	11.98	1	1	2
		nad1	2245	7433	1	1	2
		nad5	4377	14493	1	1	2
		nad7	3975	9112	1	1	2
PEZ-BD8517	hort_wit	COX1*	7.6	49235	1	1	2
		COX2	4667	30234	1	1	2
		COX3	4667	30234	1	1	2
		cytb	4667	30234	1	1	2
		atp1	6356	41176	1	1	2
		nad1	3735	12367	1	1	2
		nad5	3415	22123	1	1	2
		nad7	5522	33849	1	1	2
RBGE2148	oman	COX1*	6728	43586	1	1	2	6.728	43.586
		COX2	7751	50213	1	1	2
		COX3	7751	50213	1	1	2
		cytb	7751	50213	1	1	2
		atp1	6728	43586	1	1	2
		nad1	6728	43586	1	1	2
		nad5	6728	43586	1	1	2
		nad7	6728	43586	1	1	2
S1002	acet	COX1*	ok	ok	1	1	2	278.407	1803.59
		COX2*	ok	ok	1	1	2
		COX3*	ok	ok	1	1	2
		cytb*	ok	ok	1	1	2
		atp1*	ok	ok	1	1	2
		nad1	2861	18543	1	1	2
		nad5*	ok	ok	1	1	2
		nad7*	ok	ok	1	1	2
S1003	acra	COX1	3497	22654	1	1	2
		COX2*	11149	72226	1	1	2
		COX3*	11149	72226	1	1	2
		cytb	5601	36285	1	1	2
		atp1*	11149	72226	1	1	2
		nad1	4.16	26.95	1	1	2
		nad5	14747	95535	1	1	2
		nad7*	11149	72226	1	1	2
S1009	alch2x	COX1*	8553	55409	1	1	2
		COX2*	8553	55409	1	1	2
		COX3*	8553	55409	1	1	2
		cytb*	8553	55409	1	1	2
		atp1*	8553	55409	1	1	2
		nad1	7119	46119	1	1	2
		nad5*	8553	55409	1	1	2
		nad7*	8553	55409	1	1	2
S1010	alch4x	COX1*	ok	ok	1	1	2	83.682	542.114
		COX2*	ok	ok	1	1	2
		COX3*	ok	ok	1	1	2
		cytb*	ok	ok	1	1	2
		atp1	12711	70146	1	1	2
		nad1	4.49	29087	1	1	2
		nad5	4.7	30448	1	1	2
		nad7*	ok	ok	1	1	2
S1026	arti	COX1	ok	ok	1	1	2	73.342	475.129
		COX2	ok	ok	1	1	2
		COX3	ok	ok	1	1	2
		cytb	ok	ok	1	1	2
		atp1	ok	ok	1	1	2
		nad1	ok	ok	1	1	2
		nad5	ok	ok	1	1	2
		nad7	ok	ok	1	1	2
S1027	bark	COX1*	3451	22356	1	1	2
		COX2	3285	21281	1	1	2
		COX3	3285	21281	1	1	2
		cytb	3285	21281	1	1	2
		atp1	3451	22356	1	1	2
		nad1*	3374	21858	1	1	2
		nad5*	3451	22356	1	1	2
		nad7*	3451	22356	1	1	2
S1029	inqu	COX1	2739	17744	1	1	2	271.802	1760.8
		COX2*	ok	ok	1	1	2
		COX3*	ok	ok	1	1	2
		cytb*	ok	ok	1	1	2
		atp1*	ok	ok	1	1	2
		nad1	5679	18804	1	1	2
		nad5	9748	63.15	1	1	2
		nad7*	ok	ok	1	1	2
S1032	mult	COX1	2752	9112	1	1	2
		COX2*	4695	30415	1	1	2
		COX3*	4695	30415	1	1	2
		cytb	9409	60954	1	1	2
		atp1*	4695	30415	1	1	2
		nad1	1217	7884	1	1	2
		nad5*	2753	17835	1	1	2
		nad7*	4695	30415	1	1	2
S1033	yeme	COX1	1139	7379	1	1	2
		COX2*	4021	26049	1	1	2
		COX3*	4021	26049	1	1	2
		cytb	4591	29742	1	1	2
		atp1	2253	7.46	1	1	2
		nad1	1707	5652	1	1	2
		nad5	3404	11271	1	1	2
		nad7	4855	31452	1	1	2
S1040	pelt	COX1	3799	24611	1	1	2
		COX2*	5363	34743	1	1	2
		COX3*	5363	34743	1	1	2
		cytb	4615	29897	1	1	2
		atp1*	5363	34743	1	1	2
		nad1	2294	14861	1	1	2
		nad5	10109	65489	1	1	2
		nad7*	5363	34743	1	1	2
S1044	quin	COX1*	5978	39727	1	1	2
		COX2*	5978	39727	1	1	2
		COX3*	5978	39727	1	1	2
		cytb*	5978	39727	1	1	2
		atp1	4656	30163	1	1	2
		nad1	3449	11.42	1	1	2
		nad5*	5978	39727	1	1	2
		nad7*	5978	39727	1	1	2
S1045	ranu	COX1*	3.81	24682	1	1	2
		COX2*	3.81	24682	1	1	2
		COX3*	3.81	24682	1	1	2
		cytb*	3.81	24682	1	1	2
		atp1*	3.81	24682	1	1	2
		nad1	3366	21806	1	1	2
		nad5*	3.81	24682	1	1	2
		nad7*	3.81	24682	1	1	2
S1046	tong	COX1*	ok	ok	1	1	2	44.1	285.691
		COX2*	ok	ok	1	1	2
		COX3*	ok	ok	1	1	2
		cytb*	ok	ok	1	1	2
		atp1*	ok	ok	1	1	2
		nad1	5373	29651	1	1	2
		nad5*	ok	ok	1	1	2
		nad7*	ok	ok	1	1	2
S1070	zona	COX1	5911	38293	1	1	2	59.339	384.414
		COX2*	ok	ok	1	1	2
		COX3*	ok	ok	1	1	2
		cytb	29384	190357	1	1	2
		atp1*	ok	ok	1	1	2
		nad1	3435	22253	1	1	2
		nad5	17.32	112203	1	1	2
		nad7	8497	55046	1	1	2
S1072	elon	COX1*	25722	166643	1	1	2
		COX2	19766	128049	1	1	2
		COX3*	25722	166643	1	1	2
		cytb*	25722	166643	1	1	2
		atp1*	85243	552226	1	1	2
		nad1	12581	81503	1	1	2
		nad5	26709	173028	1	1	2
		nad7	18346	118.85	1	1	2
S1087	frut	COX1	5131	33.24	1	1	2	53.043	343.626
		COX2	5717	37036	1	1	2
		COX3	5717	37036	1	1	2
		cytb	5722	37069	1	1	2
		atp1*	ok	ok	1	1	2
		nad1	3708	24021	1	1	2
		nad5	12753	82617	1	1	2
		nad7*	ok	ok	1	1	2
S1088	arid	COX1	3721	24106	1	1	2
		COX2*	5941	38487	1	1	2
		COX3*	5941	38487	1	1	2
		cytb	21778	141084	1	1	2
		atp1*	5941	38487	1	1	2
		nad1	3639	23574	1	1	2
		nad5	5239	33.94	1	1	2
		nad7*	5941	38487	1	1	2
S1089	salm	COX1*	8293	53724	1	1	2
		COX2*	8293	53724	1	1	2
		COX3*	8293	53724	1	1	2
		cytb*	8293	53724	1	1	2
		atp1	6809	44.11	1	1	2
		nad1	1928	12.49	1	1	2
		nad5	3862	25019	1	1	2
		nad7*	8293	53724	1	1	2
S1319	karo	COX1*	ok	ok	1	1	2	377.897	2448.11
		COX2	2.54	16455	1	1	2
		COX3	2.54	16455	1	1	2
		cytb	4575	15148	1	1	2
		atp1	2301	14906	1	1	2
		nad1	1964	12723	1	1	2
		nad5	2967	19221	1	1	2
		nad7	2633	17057	1	1	2
V067490	soma	COX1	10.71	69382	1	1	2
		COX2	2867	9493	1	1	2
		COX3	2867	9493	1	1	2
		cytb	4082	9357	1	1	2
		atp1	9876	63979	1	1	2
		nad1	1633	3743	1	1	2
		nad5	9632	62399	1	1	2
		nad7	2688	8.9	1	1	2

## Sheet: verified crosses_F1_mitotyping
Crosscode	Phenotype	Cross	plant verified as real hybrid? yes/no/maybe	Hort	Inqu	Zona	Acra	Arid	Bark	Frut	Acet	Tong	Alch	Quin	Arti	Salm	Ranu	Mult	Pelt	Yeme	?	parental make up offspring	maternal (M), paternal (P), biparental (B), heteroplasmic parent (H), possible recombination '(R), wildtype (WT)	based on 1 (*) or two (**) or three (***) markers. Marker conflict (x)								F is fertile, -- is never flowered, P, is some pollen visisble (orange coloured), MS is male sterile
PEZ-BD8727_01	variegated white part	(hort_x_zona)_x_arid	yes	1		0		0														1	M	*		F1 types	# plants/cross	# marker pairs /cross	fertility phenotype (CMS)	maternal (M), paternal (P), biparental (B), heteroplasmic parent (H), possible recombination '(R), wildtype (WT)		* maybe a reflection of maternal heterozygosity
PEZ-BD8727_01	variegated green part	(hort_x_zona)_x_arid	yes	1		0		0														1	M	*		acet_x_frut	2	1	P	M
PEZ-BD8727_07	green	(hort_x_zona)_x_arid	yes	1		0		0														1	M	*		acet_x_inqu	1	2	P	M
PEZ-BD8727_07	variegated, white part	(hort_x_zona)_x_arid	yes	1		0		0														1	M	*		acet_x_zona	12	1	--	M (11) P (1)
PEZ-BD8727_07	variegated, variegated part	(hort_x_zona)_x_arid	yes	1		0		0														1	M	*		alch(4x)_x_bark	1	1	--	M
PEZ-BD8727_07	variegated, green part	(hort_x_zona)_x_arid	yes	1		0		0														1	M	*		alch(4x)_x_yeme	2	1	P	P
PEZ-BD8727_07	green	(hort_x_zona)_x_arid	yes	1		0		0														1	M	*		bark_x_frut	3	1	MS	M
PEZ-BD8727_07	yellow	(hort_x_zona)_x_arid	yes	1		0		0														1	M	*		bark_x_inqu	1	2	--	P
PEZ-BD8727_11	green part	(hort_x_zona)_x_arid	yes	1		0		0														1	M	*		bark_x_mult	3	2	MS	M
PEZ-BD8727_11	yellow part	(hort_x_zona)_x_arid	yes	1		0		0														1	M	*		bark_x_quin	2	1	--	M(2) P(1)
PEZ-BD8727_11	variegated part	(hort_x_zona)_x_arid	yes	1		0		0														1	M	*		frut_x_acet	1	1	P	M
PEZ-BD8727_12	yellow	(hort_x_zona)_x_arid	yes	1		0		0														1	M	*		frut_x_bark	3	1	MS	M
PEZ-BD8727_12	green	(hort_x_zona)_x_arid	yes	1		0		0														1	M	*		hort(4x)_x_arti(4x)	8	1	MS	M
PEZ-BD8727_12	variegated	(hort_x_zona)_x_arid	yes	1		1?		1?														1	B/H/R	*		(hort_x_zona)_x_arid	5	1	MS	M
PEZ-BD8727_12	white	(hort_x_zona)_x_arid	yes	1		0		0														1	M	*		hort_x_acet	3	2	P	M
PEZ-BD8727_13	green	(hort_x_zona)_x_arid	yes	1		0		0														1	M	*		hort_x_acra	1	1	P	M
PEZ-BD8716	variegated green/light green	acet_x_frut	yes							0	1											1	M	*		hort_x_alch	1	1	MS	M
PEZ-BD8716	chlorotic plant	acet_x_frut	yes							0	1											1	M	*		hort_x_arid	6	2	MS	M
PEZ-BD8716_02	chlorotic	acet_x_frut	yes							0	1											1	M	*		hort_x_bark	2	1	--	M
PEZ-BD8717	green	acet_x_inqu	yes		0						1											1	M	**		hort_x_frut	1	1	F	M
PEZ-BD8676_03	yellow	acet_x_zona	yes			0					1											1	M	*		hort_x_mult	1	1	MS	M
PEZ-BD8676_05	green	acet_x_zona	yes			0					1											1	M	*		hort_x_quin	15	1	MS	M(8) P(7)
PEZ-BD8676_05	white	acet_x_zona	yes			0					1											1	M	*		hort_x_tong	8	1	P	M
PEZ-BD8676_06	light green/yellow	acet_x_zona	yes			0					1											1	M	*		hort_x_tong(4x)	1	1	P	M
PEZ-BD8676_09	light green/yellow	acet_x_zona	yes			0					1											1	M	**		hort_x_zona	26	1	P	M
PEZ-BD8676_11	leaf light green 1/2	acet_x_zona	yes			0					1											1	M	*		tong_x_acet	7	1-2	P	B(1)/P
PEZ-BD8676_11	light green, whitish 2/2	acet_x_zona	yes			0					1											1	M	*		yeme_x_alch(4x)	1	1	P	P
PEZ-BD8676_13	leaf green 1/2	acet_x_zona	yes			0					1											1	M	*		P. inquinans	1	1	F	WT
PEZ-BD8676_13	leaf light green 2/2	acet_x_zona	yes			0					1											1	M	*		P. peltatum	1	1	F	WT
PEZ-BD8676_14	wit	acet_x_zona	yes			0					1											1	M	*		P. salmoneum	1	2	F	WT
PEZ-BD8676_15	variegated	acet_x_zona	yes			0					1											1	M	*		P. x hortorum_4x	1	1	P	WT*
PEZ-BD8676_16	yellow	acet_x_zona	yes			0					1											1	M	*		P. tongaense	1	1	F	WT
PEZ-BD8676_16	wit	acet_x_zona	yes			0					1											1	M	*		P. articulatum	1	1	F	WT
PEZ-BD8676_22	leaf light green 2/2	acet_x_zona	yes			0					1											1	M	*
PEZ-BD8676_23	leaf white 2/2	acet_x_zona	yes			0					1											1	M	*		P. multibreacteatum	1	2	P	WT
PEZ-BD8676_23	leaf light green 2/2	acet_x_zona	yes			0					1											1	M	*		mult_x_acet	8	2-3	--	B*
PEZ-BD8687_02	green plant very bad 1/1	acet_x_zona	yes			1					0											1	P	*		mult_x_alch	14	2	P	P*
PEZ-BD8565_1V	green	alch(4x)_x_bark	yes						0				1									1	M	*		mult_x_arid	3	1	MS	P*
PEZ-BD8651	green	alch(4x)_x_yeme	yes										0							1		1	P	*		mult_x_bark	5	2	MS	B*
PEZ-BD8658_13	green	alch(4x)_x_yeme	yes										0							1		1	P	*		mult_x_inqu	3	1	--	P*
PEL-BB9001_12	green-ok	arti	yes	0											1							1	WT	*		mult_x_pelt	3	1	MS	P*
PEL-BB9001_14	green-???	arti	yes	0											1							1	WT	*		mult_x_quin	6	2	P	P*
PEZ_BD8662_47	green	bark_x_frut	yes						1	0												1	M	*		mult_x_ranu	9	1-2	P	P*
PEZ_BD8662_49	light green	bark_x_frut	yes						1	0												1	M	*		mult_x_tong	2	1	MS	P*
PEZ-BD8662_04	pink 1/2	bark_x_frut	yes						1	0												1	M	*		mult_x_zona	2	2	MS	P*
PEZ-BD8662_04	light green 2/2	bark_x_frut	yes						1	0												1	M	*
PEZ-BD8701	normal	bark_x_inqu	yes		1				0													1	P	**		total plants	179
PEZ-BD8701	normal	bark_x_inqu	yes		1				0													1	P	**		wildtype	7
E10363_48	light green	bark_x_mult	yes						1									0				1	M	**		hybrids	172
E10363_48	green	bark_x_mult	yes						1									0				1	M	**
E10374_49	white leaf	bark_x_mult	yes						1									0				1	M	**		excluding mult series	117	0.00854701
E10374_49	light green leaf	bark_x_mult	yes						1									0				1	M	*
E10374_49	green with white tip	bark_x_mult	yes						1									0				1	M	**			0.0854701
PEZ-BD8706	yellow	bark_x_mult	yes						1									0				1	M	*		mult F1 series	55
PEZ-BD8706	green	bark_x_mult	yes						1									0				1	M	*
PEZ-BD8706	cotyl	bark_x_mult	yes						1									0				1	M	*
PEZ-BD8702_03	groen 1/2	bark_x_quin	no						1					0								1	M	*
PEZ-BD8702_03	pink - whitish 2/2	bark_x_quin	no						1					0								1	M	*			0.897436
PEZ-BD8759_07		bark_x_quin	maybe						0					1								1	P	*
PEZ-BD8720_04	green	frut_x_acet	yes							1	0											1	M	*
PEZ-BD8665_01	light green	frut_x_bark	yes						0	1												1	M	*
PEZ-BD8665_06	yellow	frut_x_bark	yes						0	1												1	M	*
PEZ-BD8665_06	green	frut_x_bark	yes						0	1												1	M	*
PEZ-BD8665_14	half green, half light green, picture 1/2	frut_x_bark	yes						0	1												1	M	*
PEZ-BD8665_14	light green 2/2	frut_x_bark	yes						0	1												1	M	*
PEL-BB3006_13	green~vir	hort(4x)_x_arti(4x)	yes	1											0							1	M	*
PEL-BB3006_16	vir	hort(4x)_x_arti(4x)	yes	1											0							1	M	*
PEL-BB3006_18	green	hort(4x)_x_arti(4x)	yes	1											0							1	M	*
PEL-BB3006_20	very vir-albino	hort(4x)_x_arti(4x)	yes	1											0							1	M	*
PEL-BB3006_21	vir	hort(4x)_x_arti(4x)	yes	1											0							1	M	*
PEL-BB3006_35	green-vir	hort(4x)_x_arti(4x)	yes	1											0							1	M	*
PEL-BB3006_38	vir-albino	hort(4x)_x_arti(4x)	yes	1											0							1	M	*
PEL-BB9001_11	green-ok	hort(4x)_x_arti(4x)	yes	1											0							1	M	*
BB4048_10V	CMS/partial	hort_4x	yes	0																	1	1	P	*
BB4048_10V	CMS/partial	hort_4x	yes	0																	1	1	P	*
PEZ-BD8534_08	lightgreen/green	hort_x_acet	yes	1							0											1	M	*
PEZ-BD8776	light green	hort_x_acet	yes	1							0											1	M	**
PEZ-BD8776	green	hort_x_acet	yes	1							0											1	M	*
PEZ-BD8776	chlorotic	hort_x_acet	yes	1							0											1	M	**
PEZ-BD8776	chlorotic	hort_x_acet	yes	1							0											1	M	**
PEZ-BD8776	chlorotic	hort_x_acet	yes	1							0											1	M	**
PEZ-BF8102	white	hort_x_acet	yes	1							0											1	M	**
PEZ-BF8102	white	hort_x_acet	yes	1							0											1	M	**
PEZ-BF8102	variegated	hort_x_acet	yes	1							0											1	M	**
PEZ-BD8713	green	hort_x_acra	yes	1			0															1	M	*
PEZ-BD8713	green	hort_x_acra	yes	1			0															1	M	*
PEZ-BD8713	green	hort_x_acra	yes	1			0															1	M	*
PEZ-BD8713	green	hort_x_acra	yes	1			0															1	M	*
PEZ-BD8713	green	hort_x_acra	yes	1							0											1	M	*
PEZ-BD8545_04	light green	hort_x_alch	yes	1									0									1	M	*
PEZ-BD8654	yellow	hort_x_arid	yes	1				0														1	M	*
PEZ-BD8654	yellow	hort_x_arid	yes	1				0														1	M	*
PEZ-BD8654_04	light green/variegated	hort_x_arid	yes	1				0														1	M	*
PEZ-BD8654_22	light green	hort_x_arid	yes	1				0														1	M	*
PEZ-BD8654_23	green leaf 1/2	hort_x_arid	yes	1				0														1	M	*
PEZ-BD8654_23	light green with white 2/2	hort_x_arid	yes	1				0														1	M	*
PEZ-BD8654_28	green part	hort_x_arid	yes	1				0														1	M	**
PEZ-BD8654_28	white part	hort_x_arid	yes	1				0														1	M	**
PEZ-BD8654_30	chlorotic/virescent/variegated	hort_x_arid	yes	1				0														1	M	*
PEZ-BD8654_30	chlorotic/virescent/variegated	hort_x_arid	yes	1				0														1	M	*
PEZ-BD8654_30	green	hort_x_arid	yes	1				0														1	M	*
PEZ-BD8654_30	White	hort_x_arid	yes	1				0														1	M	*
PEZ-BD8654_30	chim?	hort_x_arid	yes	1				0														1	M	*
PEZ-BD8654_30	light green 1/2	hort_x_arid	yes	1				0														1	M	*
PEZ-BD8654_30	green 2/2	hort_x_arid	yes	1				0														1	M	*
PEZ-BD8585_04	"groen"	hort_x_bark	yes	1					0													1	M	*
PEZ-BD8685_01	light green 1/1	hort_x_bark	yes	1					0													1	M	*
PEZ-BD8685_01	white 1/2	hort_x_bark	yes	1					0													1	M	*
PEZ-BD8685_04	wit	hort_x_bark	yes	1					0													1	M	**
PEZ-BD86PEZ	green	hort_x_frut	yes	1						0												1	M	*
PEZ-BD8549	light green	hort_x_mult	yes	1														0				1	M	*
PEZ-BD8526_01	green/ light green	hort_x_quin	yes	1										0								1	M	*
PEZ-BD8537_04	light green	hort_x_quin	yes	1										0								1	M	*
PEZ-BD8547_05	light green	hort_x_quin	yes	1										0								1	M	*
PEZ-BD8557_06	light green/ yellow	hort_x_quin	yes	1										0								1	M	*
PEZ-BD8566_12	light green	hort_x_quin	yes	1										0								1	M	*
PEZ-BD8566_12	chlorotic/ variegated	hort_x_quin	yes	1										0								1	M	*
PEZ-BD8566_01	green	hort_x_quin	yes	1										0								1	M	*
PEZ-BD8566_02	white	hort_x_quin	yes	0										1								1	P	*
PEZ-BD8566_04	light green	hort_x_quin	yes	0										1								1	P	*
PEZ-BD8566_05	green	hort_x_quin	yes	0										1								1	P	*
PEZ-BD8566_06	white	hort_x_quin	yes	0										1								1	P	*
PEZ-BD8566_07	lightgreen/ variegated	hort_x_quin	yes	0										1								1	P	*
PEZ-BD8566_08	green	hort_x_quin	yes	1										0								1	M	*
PEZ-BD8566_09	green	hort_x_quin	yes	0										1								1	P	*
PEZ-BD8566_10	green	hort_x_quin	yes	0										1								1	P	*
PEZ-BD8540_01	yellow	hort_x_tong	yes	1								0										1	M	*
PEZ-BD8540_02	green	hort_x_tong	yes	1								0										1	M	*
PEZ-BD8540_03	light green	hort_x_tong	yes	1								0										1	M	*
PEZ-BD8540_04	green	hort_x_tong	yes	1								0										1	M	*
PEZ-BD8540_05	light green	hort_x_tong	yes	1								0										1	M	*
PEZ-BD8540_06	green	hort_x_tong	yes	1								0										1	M	*
PEZ-BD8540_25	light green/variegated	hort_x_tong	yes	1								0										1	M	*
PEZ-BD8550_01	light green	hort_x_tong	yes	1								0										1	M	*
PEZ-BD8513	light green/green	hort_x_tong_4x	yes	1								0										1	M	*
8542_02	green	hort_x_zona	yes	1		0																1	M	*
8542_34	yellow	hort_x_zona	yes	1		0																1	M	*
8552_13	green	hort_x_zona	yes	1		0																1	M	*
8552_23	variegated	hort_x_zona	yes	1		0																1	M	*
8570_01	yellow	hort_x_zona	yes	1		0																1	M	*
8570_02	green	hort_x_zona	yes	1		0																1	M	*
8570_08	yellow	hort_x_zona	yes	1		0																1	M	*
PEZ-BD8542_01	yellow	hort_x_zona	yes	1		0																1	M	*
PEZ-BD8542_02	variegated part	hort_x_zona	yes	1		0																1	M	*
PEZ-BD8542_03	variegated yellow part	hort_x_zona	yes	1		0																1	M	*
PEZ-BD8542_04	green	hort_x_zona	yes	1		0																1	M	*
PEZ-BD8542_05	variegated green part	hort_x_zona	yes	1		0																1	M	*
PEZ-BD8542_06	chlorotic	hort_x_zona	yes	1		0																1	M	*
PEZ-BD8542_07	green	hort_x_zona	yes	1		0																1	M	*
PEZ-BD8542_10	variegated	hort_x_zona	yes	1		0																1	M	*
PEZ-BD8552_01	variegated	hort_x_zona	yes	1		0																1	M	*
PEZ-BD8552_02	variegated green part	hort_x_zona	yes	1		0																1	M	*
PEZ-BD8552_03	variegated yellow part	hort_x_zona	yes	1		0																1	M	*
PEZ-BD8552_04	variegated	hort_x_zona	yes	1		0																1	M	*
PEZ-BD8552_13	light green	hort_x_zona	yes	1		0																1	M	*
PEZ-BD8561_02	light green/ variegated	hort_x_zona	yes	1		0																1	M	*
PEZ-BD8570_01	variegated	hort_x_zona	yes	1		0																1	M	*
PEZ-BD8570_02	green	hort_x_zona	yes	1		0																1	M	*
PEZ-BD8570_03	yellow	hort_x_zona	yes	1		0																1	M	*
PEZ-BD8570_01	yellow	hort_x_zona	yes	1		0																1	M	*
PEZ-BD8570_12	variegated	hort_x_zona	yes	1		0																1	M	*
PEZ-BD8645_01	green	inquinans	yes		1																	1	WT	*
E10364_49	x	mult_x_acet	maybe								0							1				1	B/H/R	**x
E10364_49	x	mult_x_acet	maybe								1							0				1	B/H/R	**x
PEZ-BD8677_29	green leaf 1/2	mult_x_acet	maybe								0							1				1	B/H/R	**
PEZ-BD8677_29	green leaf 1/2	mult_x_acet	maybe								1							0				1	B/H/R	**
PEZ-BD8677_29	light green 2/2	mult_x_acet	maybe								0							1				1	B/H/R	**
PEZ-BD8677_29	light green 2/2	mult_x_acet	maybe								1							0				1	B/H/R	**
PEZ-BD8677_41	light green 1/2	mult_x_acet	maybe								0							1				1	B/H/R	**
PEZ-BD8677_41	light green 1/2	mult_x_acet	maybe								1							0				1	B/H/R	**
PEZ-BD8677_41	centre gree, edge light green 2/2	mult_x_acet	maybe								0							1				1	B/H/R	**
PEZ-BD8677_41	centre gree, edge light green 2/2	mult_x_acet	maybe								1							0				1	B/H/R	**
PEZ-BD8677_44		mult_x_acet	maybe								0							1				1	B/H/R	***x
PEZ-BD8677_44		mult_x_acet	maybe								1							0				1	B/H/R	***x
PEZ-BD8677_46	green	mult_x_acet	maybe								0							1				1	B/H/R	***x
PEZ-BD8677_46	green	mult_x_acet	maybe								1							0				1	B/H/R	***x
PEZ-BD8677_47	green	mult_x_acet	maybe								0							1				1	B/H/R	***x
PEZ-BD8677_47	green	mult_x_acet	maybe								1							0				1	B/H/R	***x
PEZ-BD8677_48	green	mult_x_acet	maybe								0							1				1	B/H/R	***x
PEZ-BD8677_48	green	mult_x_acet	maybe								1							0				1	B/H/R	***x
PEZ-BD8677_48	variegated	mult_x_acet	maybe								0							1				1	B/H/R	***x
PEZ-BD8677_48	variegated	mult_x_acet	maybe								1							0				1	B/H/R	***x
PEZ-BD8677_49	dead	mult_x_acet	maybe								0							1				1	B/H/R	***x
PEZ-BD8677_49	dead	mult_x_acet	maybe								1							0				1	B/H/R	***x
PEZ-BD8678_09	green	mult_x_alch	yes										1					0				1	P	**
PEZ-BD8678_15	dark green	mult_x_alch	yes										1					0				1	P	**
PEZ-BD8678_16	green	mult_x_alch	yes										1					0				1	P	*
PEZ-BD8678_26	yellow	mult_x_alch	yes										1					0				1	P	*
PEZ-BD8678_2V/32	lightgreen/virescent	mult_x_alch	yes										1					0				1	P	**
PEZ-BD8678_37	dark green	mult_x_alch	yes										1					0				1	P	*
PEZ-BD8678_49	light green/yellow	mult_x_alch	yes										1					0				1	P	**
PEZ-BD8678_4V/25	lightgreen/virescent	mult_x_alch	yes										1					0				1	P	**
PEZ-BD8678_50	variegated	mult_x_alch	yes										1					0				1	P	**
PEZ-BD8678_55	green	mult_x_alch	yes										1					0				1	P	*
PEZ-BD8678_5V/58	lightgreen/virescent	mult_x_alch	yes										1					0				1	P	**
PEZ-BD8678_65	green	mult_x_alch	yes										1					0				1	P	**
PEZ-BD8678_6V/ER label lost	lightgreen/virescent	mult_x_alch	yes										1					0				1	P	**
PEZ-BD8678_76	chlorotic	mult_x_alch	yes										1					0				1	P	**
PEZ-BD8679_46	chlorotic/virescent/variegated	mult_x_arid	yes					1										0				1	P	*
PEZ-BD8679_46	chlorotic/virescent/variegated	mult_x_arid	yes					1										0				1	P	*
PEZ-BD8679_51	yellow	mult_x_arid	yes					1										0				1	P	*
PEZ-BD8679_51	green	mult_x_arid	yes					1										0				1	P	*
PEZ-BD8679_64	green	mult_x_arid	yes					0										0				0	--	*
PEZ-BD8685/E10341_47	white part	mult_x_bark	yes						0									1				1	B/H/R	**
PEZ-BD8685/E10341_47	white part	mult_x_bark	yes						1									0				1	B/H/R	**
PEZ-BD8685/E10341_47	green part	mult_x_bark	yes						0									1				1	B/H/R	**
PEZ-BD8685/E10341_47	green part	mult_x_bark	yes						1									0				1	B/H/R	**
PEZ-BD8685/E10341_47	green	mult_x_bark	yes						0									1				1	B/H/R	**
PEZ-BD8685/E10341_47	green	mult_x_bark	yes						1									0				1	B/H/R	**
PEZ-BD8687_01	light green	mult_x_bark	yes						0									0				0	--/H/R	**
PEZ-BD8687_01	red 1/2	mult_x_bark	yes						1									0				1	P	*
PEZ-BD8687_01	green 2/2	mult_x_bark	yes						1									0				1	P	*
PEZ-BD8687_02	light green	mult_x_bark	yes						0									1				1	M	**x
PEZ-BD8687_02	light green	mult_x_bark	yes						1									0				1	P	**x
PEZ-BD8687_48	green	mult_x_bark	yes						1									0				1	M	**
PEZ-BD86PEZ	yellow	mult_x_bark	yes						1									0				1	M	*
PEZ-BD86PEZ	green	mult_x_bark	yes						1									0				1	M	*
PEZ-BD86PEZ	cotyl	mult_x_bark	yes						1									0				1	M	*
E10342_47	NA	mult_x_inqu	maybe		0													0				0	--	*
PEZ-BD8680_09	light green/white	mult_x_inqu	maybe		1													0				1	P	*
PEZ-BD8680_10	white part	mult_x_inqu	maybe		1													0				1	P	*
PEZ-BD8680_10	green part	mult_x_inqu	maybe		1													0				1	P	*
BB8103_58	chlorotic	mult_x_pelt	yes															0	1			1	P	*
BB8103_58	green	mult_x_pelt	yes															0	1			1	P	*
BB8103_58	green	mult_x_pelt	yes															0	1			1	P	*
BB8103_63	chlorotic	mult_x_pelt	yes															0	1			1	P	*
BB8103_63	chlorotic	mult_x_pelt	yes															0	0			0	--	*
BB8103_63	green	mult_x_pelt	yes															0	1			1	P	*
PELBB8103_58	chlorotic	mult_x_pelt	yes															0	1			1	P	*
PEL-BB8103_63	chlorotic	mult_x_pelt	yes															0	1			1	P	*
PEZ-BD8103_63	chlorotic	mult_x_pelt	yes															0	1			1	P	*
PEZ-BD8681_07	light green	mult_x_quin	yes											1				0				1	P	*
PEZ-BD8681_15	green	mult_x_quin	yes											1				0				1	P	*
PEZ-BD8681_1V/08	green	mult_x_quin	yes											1				0				1	P	**
PEZ-BD8681_2V/06	green	mult_x_quin	yes											1				0				1	P	**
PEZ-BD8681_34	green	mult_x_quin	yes											1				0				1	P	**
PEZ-BD8681_3V/09	green	mult_x_quin	yes											1				0				1	P	**
PEZ-BD8684_02	green	mult_x_ranu	yes														1	0				1	P	*
PEZ-BD8684_04	light green	mult_x_ranu	yes														1	0				1	P	*
PEZ-BD8684_04	white part	mult_x_ranu	yes														0	0				0	--	*
PEZ-BD8684_11	green-light green	mult_x_ranu	yes														0	0				0	--	**
PEZ-BD8684_13	very light green	mult_x_ranu	yes														1	0				1	P	*
PEZ-BD8684_14	light green/white	mult_x_ranu	yes														1	0				1	P	**
PEZ-BD8684_15	light green/white	mult_x_ranu	yes														1	0				1	P	**
PEZ-BD8684_19	light green/white	mult_x_ranu	yes														0	0				0	--/H/R	*
PEZ-BD8684_1V/06	green	mult_x_ranu	yes														1	0				1	P	**
PEZ-BD8684_2V/02	green	mult_x_ranu	yes														1	0				1	P	**
E10287_37	white leaves	mult_x_tong	maybe									1						0				1	P	*
PEZ-BD8682_03	light green	mult_x_tong	maybe									1						0				1	P	*
PEZ-BD8683_01	lightgreen	mult_x_zona	yes			1												0				1	P	*
PEZ-BD8683_04	very light green	mult_x_zona	yes			0												0				0	--/H/R	**
PEZ-BD8647_02	green	multibracteatum	yes															0			1	1	WT/H/R	**x
S1034	green	peltatum	yes																0			0	WT	*
PEZ-BD8763	chlorotic	quin_x_bark	no																			0	--	*
S1089	dwarf	salmoneum	yes													1						1	WT	*
S1089	normal	salmoneum	yes													1						1	WT	*
S1089_01	green	salmoneum	yes													1						1	WT	*
PEZ-BD8721_01	green	tong_x_acet	yes								1	1										2	B	**
PEZ-BD8721_01	green	tong_x_acet	yes								0	1										1	M	*
PEZ-BD8721_02	groen	tong_x_acet	yes								0	1										1	M	*
PEZ-BD8721_03	groen	tong_x_acet	yes								0	1										1	M	*
PEZ-BD8721_05	green	tong_x_acet	yes								0	1										1	M	*
PEZ-BD8721_06	groen	tong_x_acet	yes								0	1										1	M	*
PEZ-BD8721_12	groen	tong_x_acet	yes								0	1										1	M	*
PEZ-BD8721_14	yellow	tong_x_acet	yes								0	1										1	M	*
S1046	green	tongaense	yes									1										1	WT	-
S1046	variegated	tongaense	yes									1										1	WT	-
PEZ-BD8667_3V	green	yeme_x_alch(4x)	yes										1							0		1	P	*

## Sheet: kasp_primers
			Set name	Name	Sequence	Target	Fluorescent dye	located in exon	position
			MUYE	MultYeme_KU_I_F1	GAAGGTGACCAAGTTCATGCTCATGAACAACCCTTTGTGGTAGACTA	Ciconium	FAM	COX2
				MultYeme_KU_I_F2	GAAGGTCGGAGTCAACGGATTATGAACAACCCTTTGTGGTAGACTC	MULT/YEME	HEX	COX2
				MultYeme_KU_I_R1	GTCTTAGCTCGTGCTTTGTGGCATT
			ACET	Acet_KU_I_F1	GAAGGTGACCAAGTTCATGCTCATAAGTCCAATACCACTGATGC	ACET	FAM	COX2
				Acet_KU_I_F2	GAAGGTCGGAGTCAACGGATTACTCATAAGTCCAATACCACTGATGA	Ciconium	HEX	COX2
				Acet_KU_I_R1	GAGATAGTGGTCAATCCTGCAATTACTAT
			BARK	Bark_KU_I_F1	GAAGGTGACCAAGTTCATGCTGGAGATAAGAATGTTAGAACAAGTAACAG	BARK	FAM	NAD7
				Bark_KU_I_F2	GAAGGTCGGAGTCAACGGATTAGGAGATAAGAATGTTAGAACAAGTAACAT	Ciconium	HEX	NAD7
				Bark_KU_I_R1	GGGAAGTCTCTCGGTTCTTTTCACAT
			INMU	HoInSa_dnp7654_A1	GAAGGTGACCAAGTTCATGCTAATACAAATAAGAGTTGTTCCATGAATTTGAAT	INQU, HORT, SALM, MULT	FAM	NAD5
				HoInSa_dnp7654_A2	GAAGGTCGGAGTCAACGGATTACAAATAAGAGTTGTTCCATGAATTTGAAG	Ciconium	HEX	NAD5
				HoInSa_dnp7654_C1	GCATCTCTACCAAGCGGCTCCTT
